# Supplementary material for: Beyond fluorine: sustainable ternary polymer electrolytes for lithium batteries
Source: Royal Society of Chemistry journal article supplement (doi:10.1039/d1gc02451e), 2021-01-01
Supplement: d1gc02451e1.pdf [file d1gc02451e1.pdf]

**Supporting information for**  
**Beyond Fluorine:**  
**Sustainable Ternary Polymer Electrolytes for Lithium Batteries**

*Jan-Philipp Hoffknecht, Jaschar Atik, Christian Krause, Johannes Thienenkamp, Gunther Brunklaus,  
Martin Winter, Elie Paillard*

Table S1: DSC procedure used for polymer electrolytes and ionic liquids.

| STEP | START / °C | STOP / °C | RATE / °C MIN <sup>-1</sup> |
|------|------------|-----------|-----------------------------|
| 1    | 20         | -150      | 5                           |
| 2    | -150       | 60        | 5                           |
| 3    | 60         | 60        | Isotherm 10 min             |
| 4    | 60         | -150      | Quench                      |
| 5    | -150       | 80        | 5                           |
| 6    | 80         | -150      | 5                           |
| 7    | -150       | 80        | 5                           |
| 8    | 80         | RT        | 5                           |

Table S2: Thermal behavior of DCTA and TFSI-based membranes with different PEO:salt:IL ratios during the first DSC cooling scan from RT to -150 °C (step 1).

| Step 1, cooling scan (crystallization) |               |              |                         |
|----------------------------------------|---------------|--------------|-------------------------|
| Membrane                               | T(onset) / °C | T(peak) / °C | ΔHc / J g <sup>-1</sup> |
| DCTA 20:2:4                            | -19.9         | -25.1        | 22.9                    |
| DCTA 20:2:2                            | n.a.          | n.a.         | n.a.                    |
| DCTA 20:1:2                            | n.a.          | n.a.         | n.a.                    |
| DCTA 20:1:1                            | n.a.          | n.a.         | n.a.                    |
| DCTA 20:1:0.5                          | n.a.          | n.a.         | n.a.                    |
| DCTA 20:1:0                            | n.a.          | n.a.         | n.a.                    |
|                                        |               |              |                         |
| TFSI 20:2:2                            | n.a.          | n.a.         | n.a.                    |
| TFSI 20:1:2                            | n.a.          | n.a.         | n.a.                    |
| TFSI 20:1:1                            | n.a.          | n.a.         | n.a.                    |
| TFSI 20:1:0.5                          | n.a.          | n.a.         | n.a.                    |
| TFSI 20:1:0                            | n.a.          | n.a.         | n.a.                    |

Table S3: Thermal behavior of DCTA and TFSI-based membranes with different PEO:salt:IL ratios during the first DSC heating scan from -150 to 60 °C (step 2).

| <b>Step 2, heating scan (melting)</b> |                      |                     |                               |
|---------------------------------------|----------------------|---------------------|-------------------------------|
| <b>Membrane</b>                       | <b>T(onset) / °C</b> | <b>T(peak) / °C</b> | <b>ΔHm / J g<sup>-1</sup></b> |
| <b>DCTA 20:2:4</b>                    | 32.2                 | 46.5                | 41.1                          |
|                                       | 1.8                  | 9.7                 | 19.0                          |
| <b>DCTA 20:2:2</b>                    | 32.0                 | 45.6                | 52.4                          |
|                                       | -0.6                 | 6.6                 | 4.6                           |
| <b>DCTA 20:1:2</b>                    | 31.3                 | 50.4                | 31.3                          |
| <b>DCTA 20:1:1</b>                    | 36.7                 | 55.7                | n.a.                          |
| <b>DCTA 20:1:0.5</b>                  | 33.5                 | 57.1                | n.a.                          |
| <b>DCTA 20:1:0</b>                    | 42.7                 | 57.7                | n.a.                          |
| <b>TFSI 20:2:2</b>                    | 21.5                 | 40.5                | 3.8                           |
| <b>TFSI 20:1:2</b>                    | 39.4                 | 51.9                | 28.3                          |
| <b>TFSI 20:1:1</b>                    | 43.3                 | 54.6                | 42.2                          |
| <b>TFSI 20:1:0.5</b>                  | 46.1                 | 56.5                | 50.7                          |
| <b>TFSI 20:1:0</b>                    | 46.5                 | n.a.                | n.a.                          |

Table S4: Thermal behavior of DCTA and TFSI-based membranes with different PEO:salt:IL ratios during the first DSC cooling scan from 80 to -150 °C (step 6).

| <b>Step 6, cooling scan (crystallization)</b> |                      |                     |                               |
|-----------------------------------------------|----------------------|---------------------|-------------------------------|
| <b>Membrane</b>                               | <b>T(onset) / °C</b> | <b>T(peak) / °C</b> | <b>ΔHc / J g<sup>-1</sup></b> |
| <b>DCTA 20:2:4</b>                            | n.a.                 | n.a.                | n.a.                          |
| <b>DCTA 20:2:2</b>                            | n.a.                 | n.a.                | n.a.                          |
| <b>DCTA 20:1:2</b>                            | 18.3                 | 3.5                 | 4.6                           |
| <b>DCTA 20:1:1</b>                            | 23.6                 | 12.1                | 44.3                          |
| <b>DCTA 20:1:0.5</b>                          | 30.2                 | 19.9                | 79.0                          |
| <b>DCTA 20:1:0</b>                            | 39.5                 | 34.9                | 83.6                          |
| <b>TFSI 20:2:2</b>                            |                      |                     |                               |
| <b>TFSI 20:1:2</b>                            | 25.7                 | 21.2                | 32.1                          |
| <b>TFSI 20:1:1</b>                            | 32.1                 | 29.2                | 42.1                          |
| <b>TFSI 20:1:0.5</b>                          | 36.7                 | 34.5                | 48.1                          |
| <b>TFSI 20:1:0</b>                            | 43.2                 | 37.7                | 63.8                          |

Table S5: Thermal behavior of DCTA and TFSI-based membranes with different PEO:salt:IL ratios during the first DSC heating scan from -150 to 80 °C (step 7).

| Membrane             | Step 7, heating scan (cold crystallization) |              |                                  | Step 7, heating scan (melting) |              |                                  |
|----------------------|---------------------------------------------|--------------|----------------------------------|--------------------------------|--------------|----------------------------------|
|                      | T(onset) / °C                               | T(peak) / °C | $\Delta H_c$ / J g <sup>-1</sup> | T(onset) / °C                  | T(peak) / °C | $\Delta H_m$ / J g <sup>-1</sup> |
| <b>DCTA 20:2:4</b>   | n.a.                                        | n.a.         | n.a.                             | n.a.                           | n.a.         | n.a.                             |
| <b>DCTA 20:2:2</b>   | 11.4                                        | 21.5         | 3.4                              | 34.4                           | 38.5         | 4.4                              |
| <b>DCTA 20:1:2</b>   | -7.7                                        | 1.1          | 45.7                             | 26.5                           | 44.0         | 46.6                             |
| <b>DCTA 20:1:1</b>   | -11.9                                       | -0.1         | 21.9                             | 34.3                           | 49.5         | 57.9                             |
| <b>DCTA 20:1:0.5</b> | n.a.                                        | n.a.         | n.a.                             | 39.7                           | 54.4         | 69.7                             |
| <b>DCTA 20:1:0</b>   | n.a.                                        | n.a.         | n.a.                             | 49.8                           | 59.6         | 90.8                             |
| <b>TFSI 20:2:2</b>   | n.a.                                        | n.a.         | n.a.                             | 26.5                           | 32.4         | 0.6                              |
| <b>TFSI 20:1:2</b>   | n.a.                                        | n.a.         | n.a.                             | 35.7                           | 48.8         | 28.0                             |
| <b>TFSI 20:1:1</b>   | n.a.                                        | n.a.         | n.a.                             | 39.7                           | 52.0         | 38.3                             |
| <b>TFSI 20:1:0.5</b> | n.a.                                        | n.a.         | n.a.                             | 42.6                           | 54.7         | 49.1                             |
| <b>TFSI 20:1:0</b>   | n.a.                                        | n.a.         | n.a.                             | 50.6                           | 66.0         | 59.4                             |

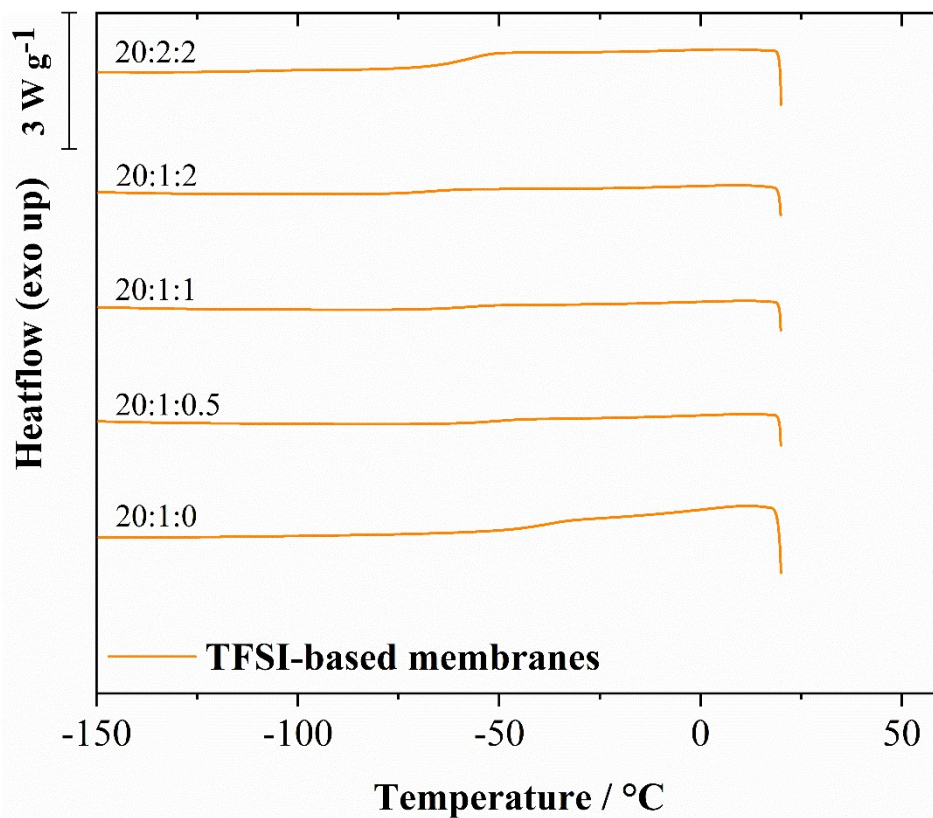

Figure S1: DSC thermograms of TFSI-based membranes with different PEO:salt:IL ratios, as indicated on the curves; scan rate:  $5 \text{ }^{\circ}\text{C min}^{-1}$ ; cooling scan from RT to  $-150 \text{ }^{\circ}\text{C}$  (step 1).

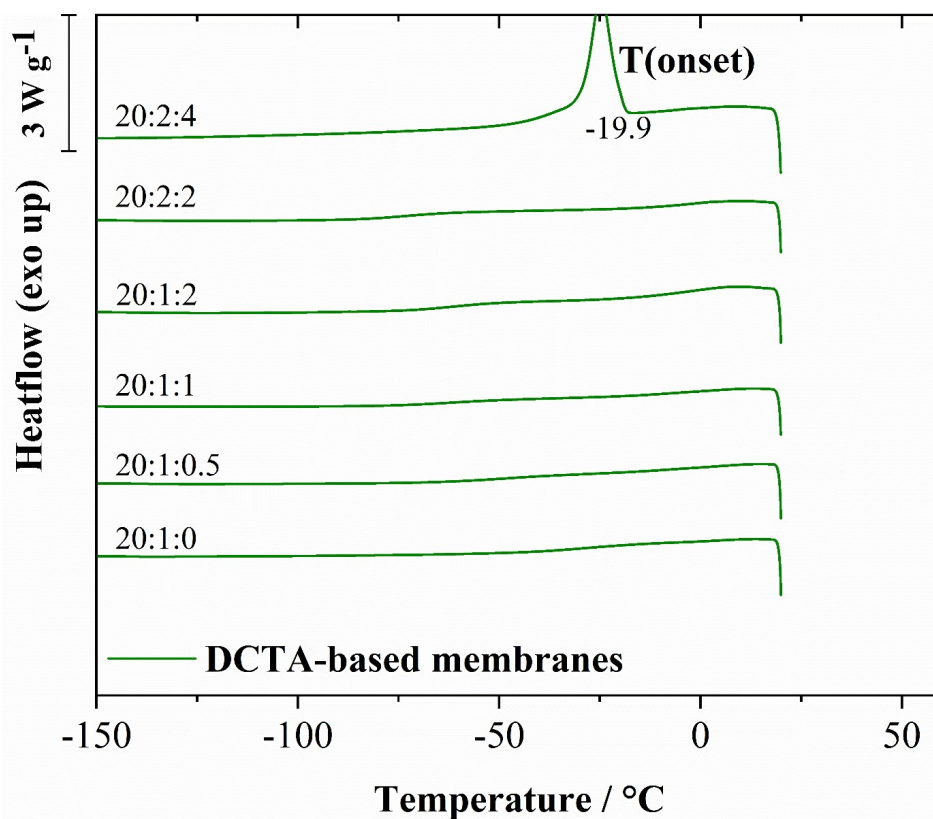

Figure S2: DSC thermograms of DCTA-based membranes with different PEO:salt:IL ratios, as indicated on the curves; scan rate:  $5 \text{ }^{\circ}\text{C min}^{-1}$ ; cooling scan from RT to  $-150 \text{ }^{\circ}\text{C}$  (step 1).

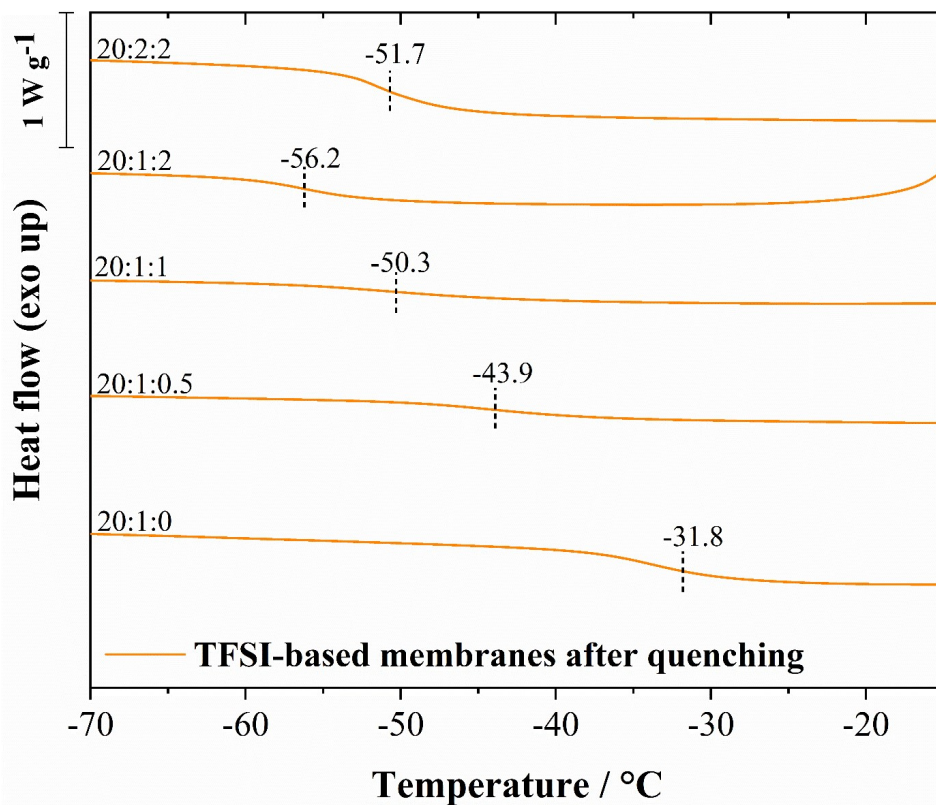

Figure S3: DSC thermograms of TFSI-based membranes with different PEO:salt:IL ratios, as indicated on the curves; scan rate:  $5 \text{ }^{\circ}\text{C min}^{-1}$ ; heating scan after quenching (step 5); magnification of  $T_g$ .

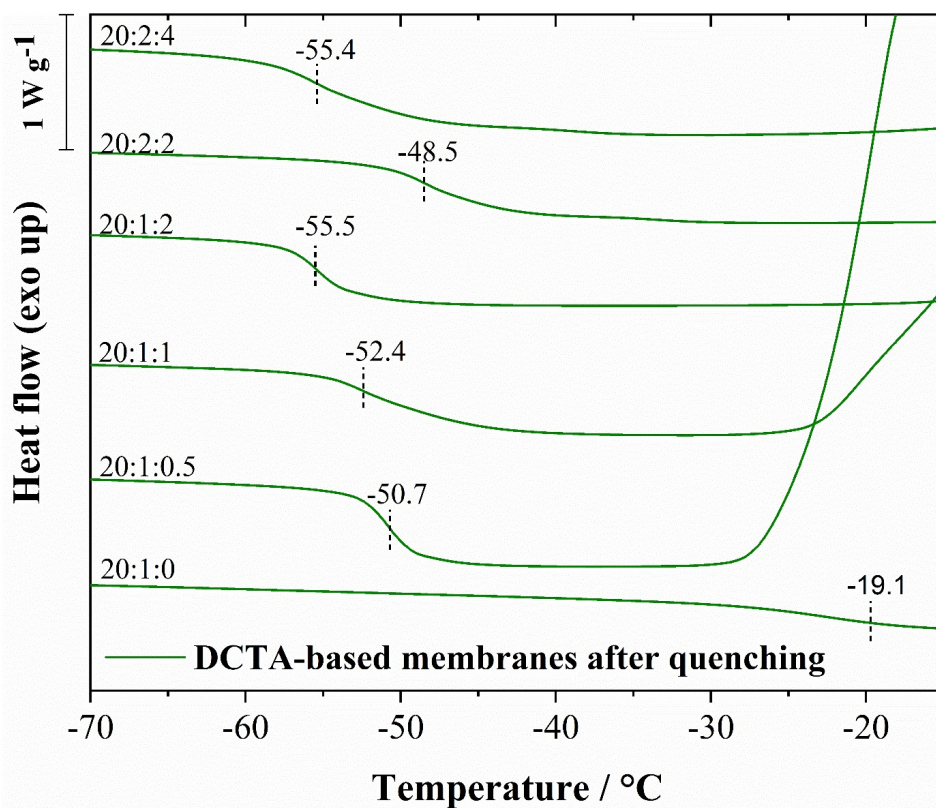

Figure S4: DSC thermograms of DCTA-based membranes with different PEO:salt:IL ratios, as indicated on the curves; scan rate:  $5 \text{ }^{\circ}\text{C min}^{-1}$ ; heating scan after quenching (step 5); magnification of  $T_g$ .



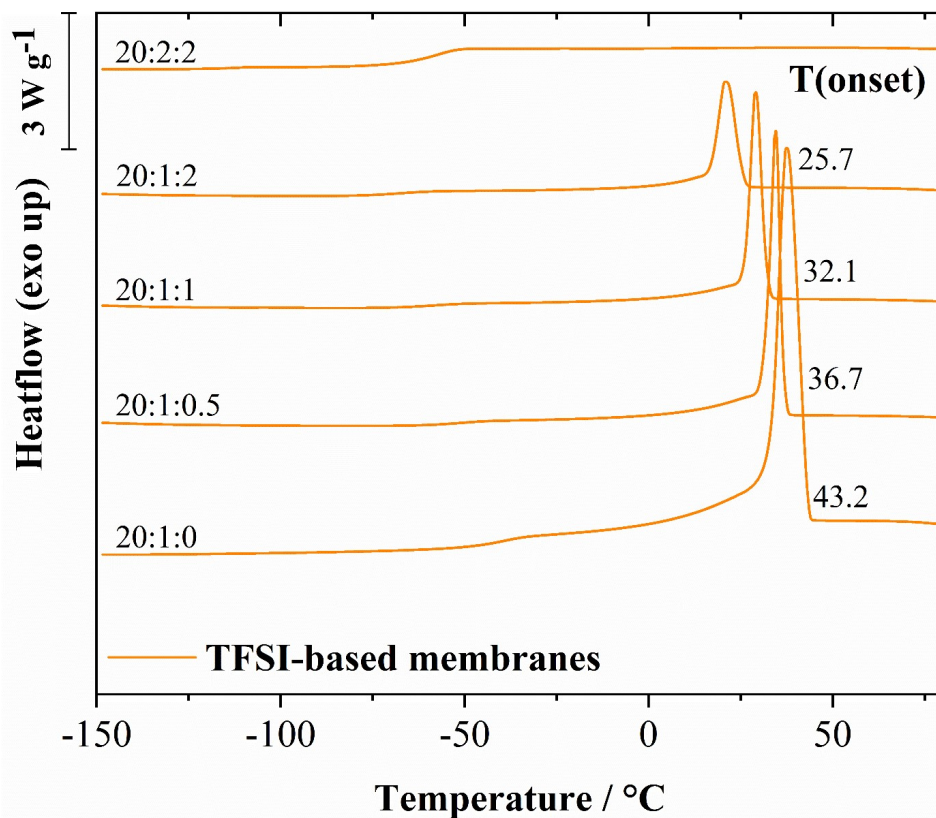

Figure S5: DSC thermograms of TFSI-based membranes with different PEO:salt:IL ratios, as indicated on the curves; scan rate: 5 °C min<sup>-1</sup>; cooling scan from 80 to -150 °C (step 6).

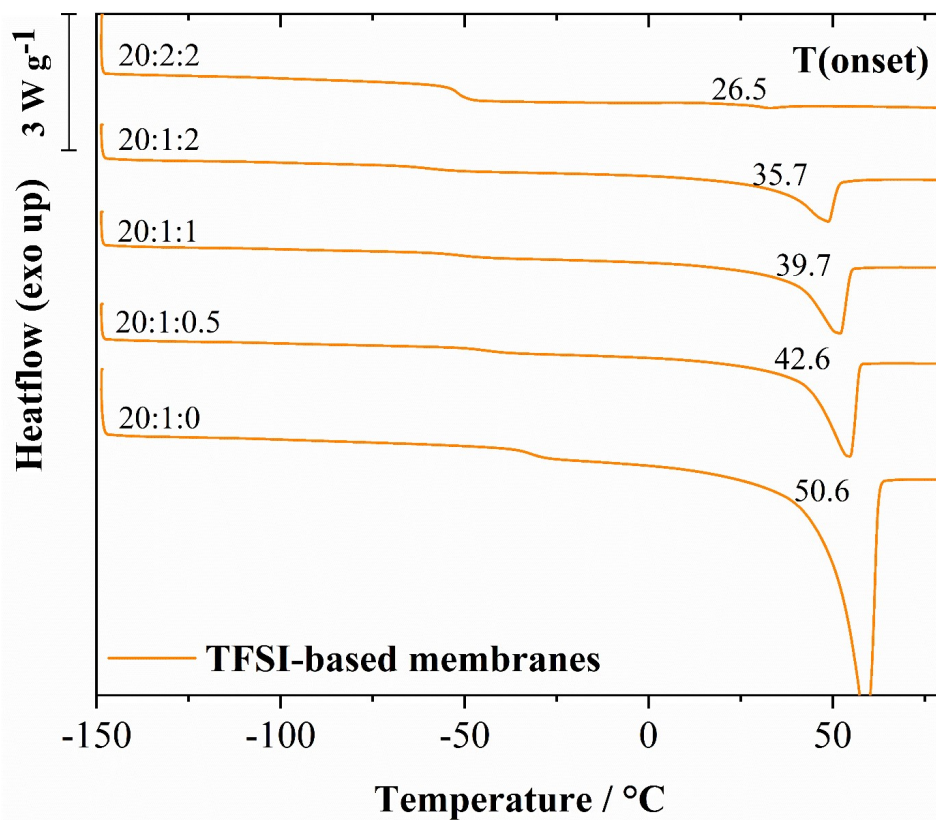

Figure S6: DSC thermograms of TFSI-based membranes with different PEO:salt:IL ratios, as indicated on the curves; scan rate: 5 °C min<sup>-1</sup>; heating scan from -150 to 80 °C (step 7).

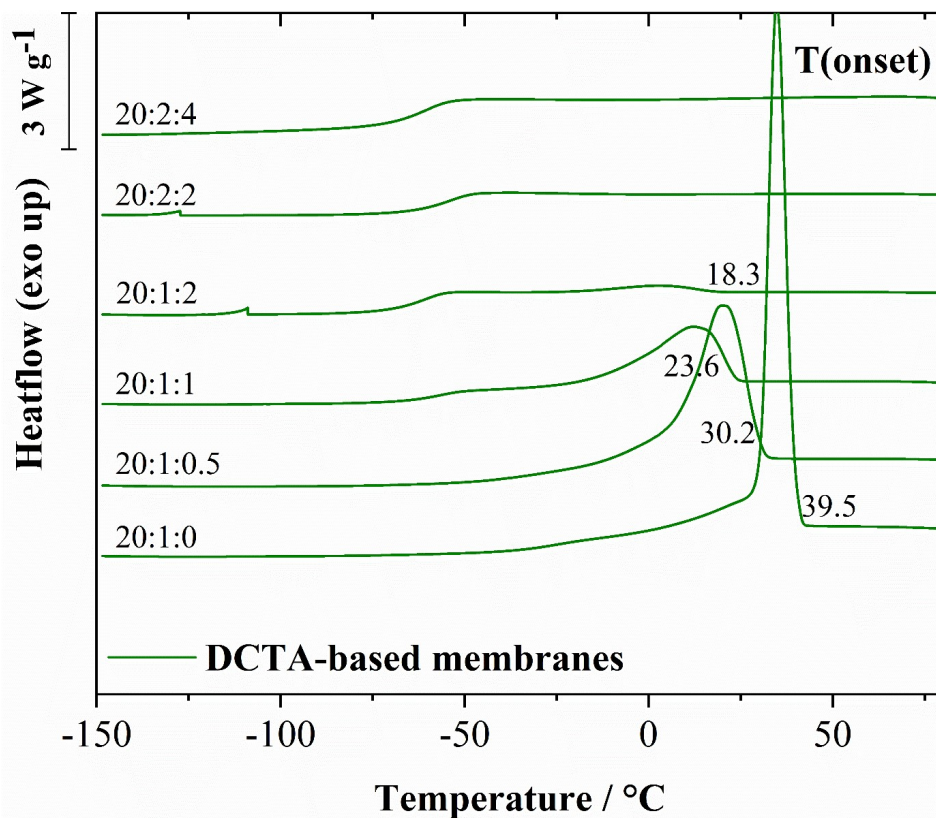

Figure S7: DSC thermograms of DCTA-based membranes with different PEO:salt:IL ratios, as indicated on the curves; scan rate:  $5 \text{ }^{\circ}\text{C min}^{-1}$ ; cooling scan from 80 to  $-150 \text{ }^{\circ}\text{C}$  (step 6).

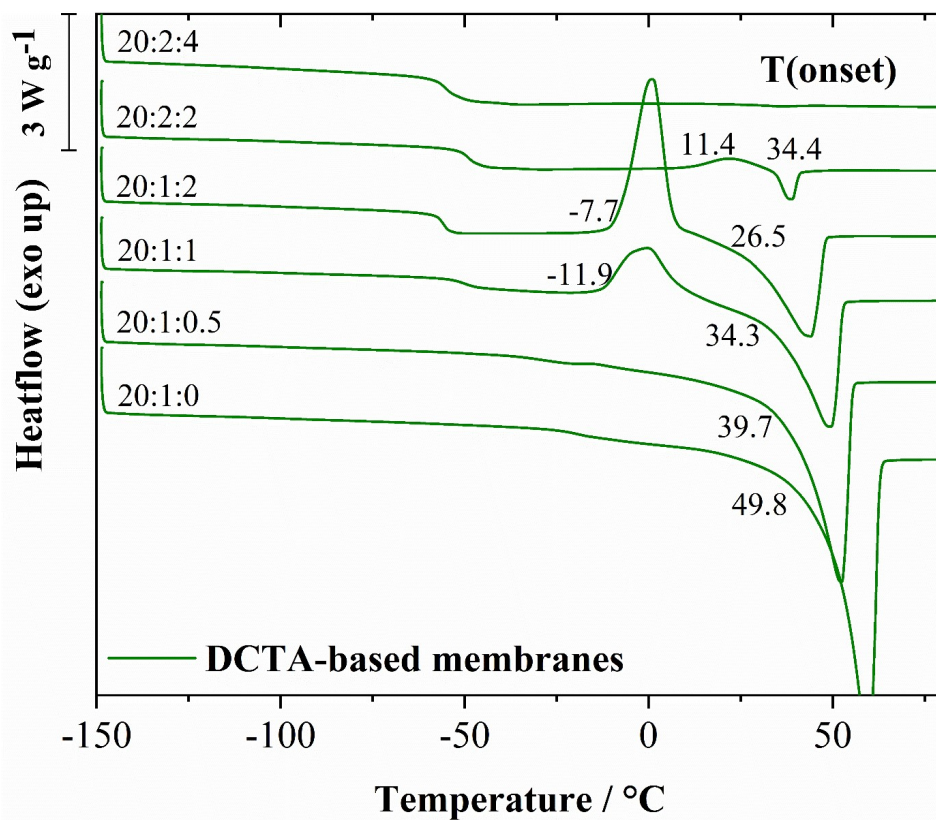

Figure S8: DSC thermograms of DCTA-based membranes with different PEO:salt:IL ratios, as indicated on the curves; scan rate:  $5 \text{ }^{\circ}\text{C min}^{-1}$ ; heating scan from  $-150$  to  $80 \text{ }^{\circ}\text{C}$  (step 7).

Table S6: Ohmic drop and equivalent series resistance of selected cycles from LFP/Li metal cell with the DCTA 20:2:4 ternary polymer electrolyte.

| <b>DCTA 20:2:4</b>  |               |                |                                                  |
|---------------------|---------------|----------------|--------------------------------------------------|
| <b>Cycle number</b> | <b>C-rate</b> | $\Delta V / V$ | <b>ESR / m<math>\Omega</math> cm<sup>2</sup></b> |
| <b>1</b>            | 0.1           | 0.0381         | 1267                                             |
| <b>5</b>            | 0.5           | 0.1956         | 1301                                             |
| <b>50</b>           | 0.5           | 0.2452         | 1631                                             |
| <b>100</b>          | 0.5           | 0.2693         | 1792                                             |
| <b>200</b>          | 0.5           | 0.3074         | 2045                                             |
| <b>300</b>          | 0.5           | 0.3177         | 2114                                             |

Table S7: Ohmic drop and equivalent series resistance of selected cycles from LFP/Li metal cell with the DCTA 20:2:4 ternary polymer electrolyte.

| <b>TFSI 20:2:2</b>  |               |                |                                                  |
|---------------------|---------------|----------------|--------------------------------------------------|
| <b>Cycle number</b> | <b>C-rate</b> | $\Delta V / V$ | <b>ESR / m<math>\Omega</math> cm<sup>2</sup></b> |
| <b>1</b>            | 0.1           | 0.0160         | 532                                              |
| <b>5</b>            | 0.5           | 0.0822         | 547                                              |
| <b>50</b>           | 0.5           | 0.0917         | 610                                              |
| <b>100</b>          | 0.5           | 0.1001         | 666                                              |
| <b>200</b>          | 0.5           | 0.1120         | 745                                              |
| <b>300</b>          | 0.5           | 0.1243         | 827                                              |



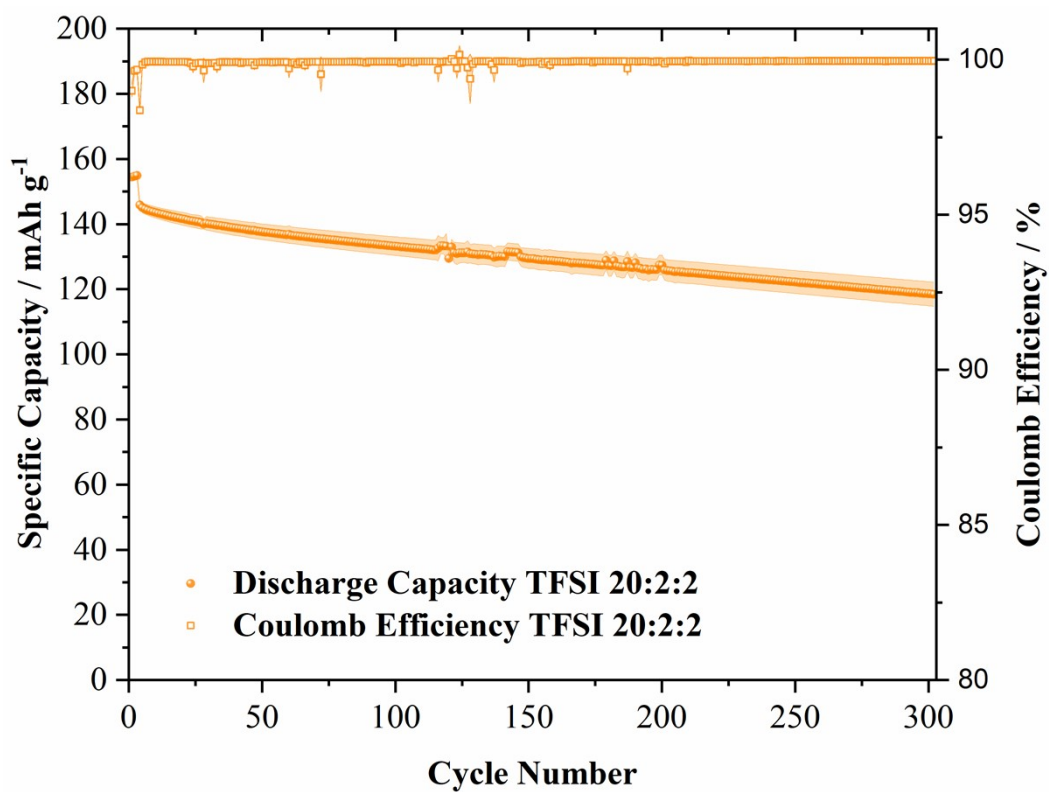

Figure S9: Galvanostatic cycling (300 cycles) of LFP|Li metal cells with a TFSI 20:2:2 TSPE between 2.5 and 3.8 V vs. Li<sup>+</sup>|Li; 3 formation cycles: C/10, then C/2; mass loading: 1.1 mg cm<sup>-2</sup>.

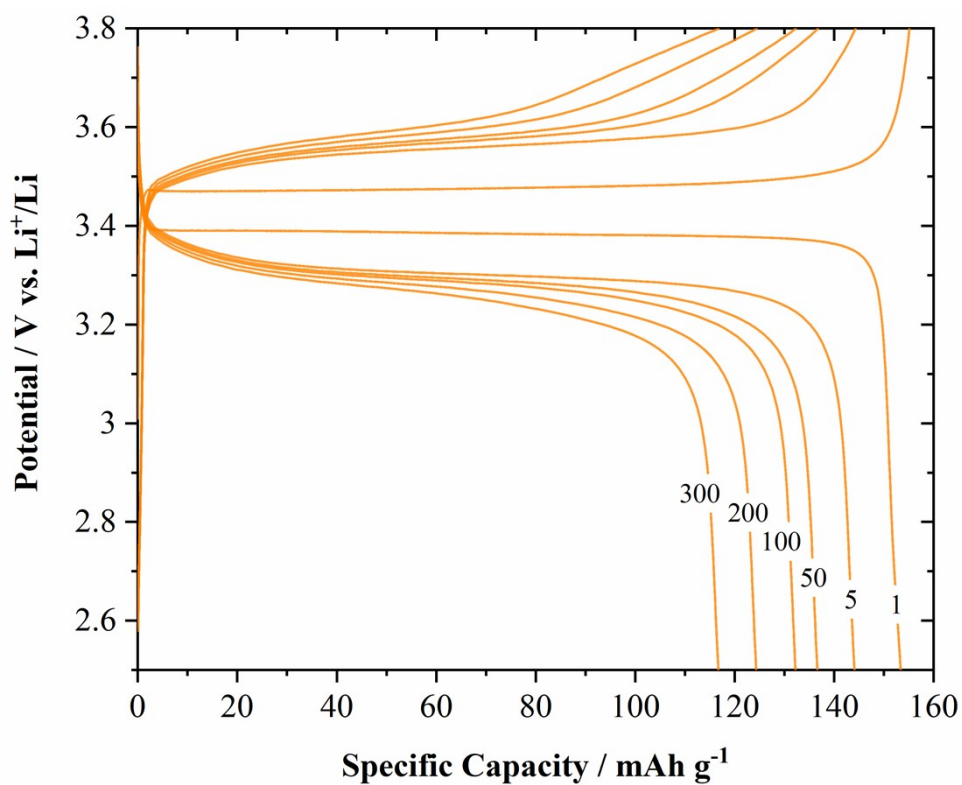

Figure S10: Potential profiles of selected charge and discharge curves of the long-term cycling (300 cycles) with TFSI 20:2:2 shown in figure S9.

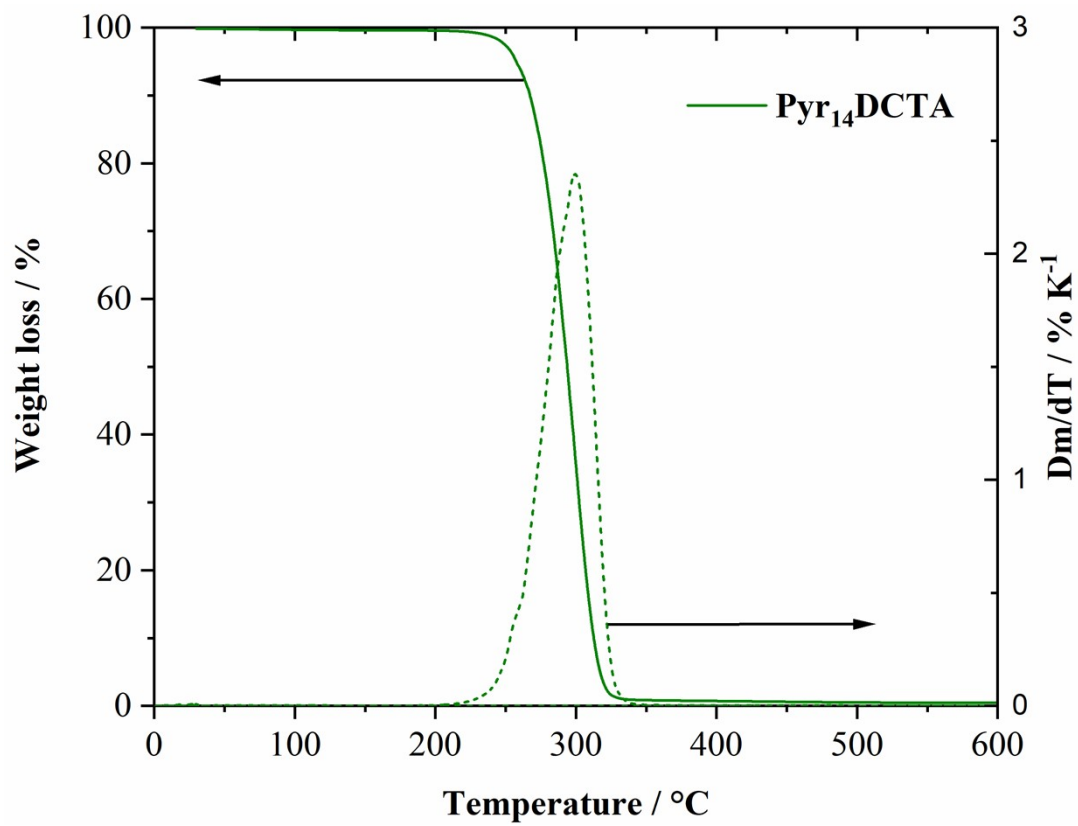

Figure S11: Thermogravimetric Analysis of Pyr<sub>14</sub>DCTA und N<sub>2</sub> atmosphere; scan rate: 10 K min<sup>-1</sup>.
